# Supplementary material
Source: PubMed Central journal article supplement (PMC10594172)
Supplement: jamainternmed-e235475-s002.pdf [file jamainternmed-e235475-s002.pdf]

## Data Sharing Statement

Haghighat. Homelessness and Incidence and Causes of Sudden Death. *JAMA Intern Med.*  
Published October 23, 2023. doi:10.1001/jamainternmed.2023.5475

### Data

**Data available:** Yes

**Data types:** Other (please specify)

**Additional Information:** The data underlying this article will be shared upon reasonable written request approved by the corresponding author.

**How to access data:** [zhtseng@medicine.ucsf.edu](mailto:zhtseng@medicine.ucsf.edu)

**When available:** With publication

### Supporting Documents

**Document types:** None

### Additional Information

**Who can access the data:** Data will be made available to researchers whose proposed use of the data has been approved by the corresponding author.

**Types of analyses:** Data will be made available for further research purposes.

**Mechanisms of data availability:** Data will be made available upon written request submitted to and approved by the corresponding author.
